# Supplementary material for: The Etiology of Community-Acquired Pneumonia Correlates with Serum Inflammatory Markers in Children
Source: MDPI journal article supplement (doi:10.3390/jcm11195506), 2022-09-20
Supplement: s1 [file s1]

| AP vs VP |       |       |       |        |      |                 |                 |                 |                 |
|----------|-------|-------|-------|--------|------|-----------------|-----------------|-----------------|-----------------|
| WBC      |       |       |       | ns     |      |                 |                 |                 |                 |
| ANC      | 0.664 | 0.582 | 0.746 | 0.0001 | 3.73 | 87.76%          | 40.91%          | 32.09%          | 91.30%          |
|          |       |       |       |        |      | 75.23% - 95.37% | 33.06% - 49.11% | 28.54% - 35.85% | 82.89% - 95.79% |
| CRP      |       |       |       | ns     |      |                 |                 |                 |                 |
| PCT      | 0.692 | 0.607 | 0.776 | 0.0000 | 0.18 | 80.00%          | 59.85%          | 39.56%          | 90.11%          |
|          |       |       |       |        |      | 65.40% - 90.42% | 51.14% - 68.13% | 33.74% - 45.70% | 83.33% - 94.32% |
| CRP/PCT  | 0.752 | 0.670 | 0.833 | 0.0000 | 65.1 | 77.78%          | 66.42%          | 43.21%          | 90.10%          |
|          |       |       |       |        |      | 62.91% - 88.80% | 57.86% - 74.26% | 36.45% - 50.23% | 83.87% - 94.09% |
